# 1 Uncovering the drivers of host-associated microbiota with joint 2 species distribution modeling

3 Johannes R. Björk<sup>1,4\*</sup>, Francis KC. Hui<sup>2</sup>, Robert B. O’Hara<sup>3</sup>, and Jose M. Montoya<sup>4</sup>

4 <sup>1</sup>Department of Biological Sciences, University of Notre Dame, United States

5 <sup>2</sup>Mathematical Sciences Institute, The Australian National University, Canberra, Australia

6 <sup>3</sup>Department of Mathematical Sciences, NTNU, Trondheim, Norway

7 <sup>3</sup>Biodiversity and Climate Research Centre, Frankfurt, Germany

8 <sup>4</sup>Theoretical and Experimental Ecology Station, CNRS-University Paul Sabatier, Moulis, France

9 <sup>1,4\*</sup> *rbjork@nd.edu (Corresponding author)*

10 <sup>2</sup> *francis.hui@anu.edu.au*

11 <sup>3</sup> *bob.ohara@ntnu.no*

12 <sup>4</sup> *joemaria.montoyateran@sete.cnrs.fr*

## 13 Abstract

14 In addition to the processes structuring free-living communities, host-associated microbiota are directly or indirectly  
15 shaped by the host. Therefore, microbiota data have a hierarchical structure where samples are nested under one or  
16 several variables representing host-specific factors, often spanning multiple levels of biological organization. Current  
17 statistical methods do not accommodate this hierarchical data structure, and therefore cannot explicitly account for the  
18 effect of the host in structuring the microbiota. We introduce a novel extension of joint species distribution models  
19 which can straightforwardly accommodate and discern between effects such as host phylogeny and traits, recorded co-  
20 variates like diet and collection site, among other ecological processes. Our proposed methodology includes powerful  
21 yet familiar outputs seen in community ecology overall, including: (i) model-based ordination to visualize and quan-  
22 tify the main patterns in the data; (ii) variance partitioning to assess how influential the included host-specific factors  
23 are in structuring the microbiota; and (iii) co-occurrence networks to visualize microbe-to-microbe associations.

24 **Keywords: Host-associated; Microbiota; Microbiome; Joint species distribution models; Generalized linear**  
25 **mixed models; Bayesian inference**

## 26 Introduction

27 Ecological communities are the product of stochastic and deterministic processes; while environmental factors may set  
28 the upper bound on carrying capacity, competitive and facilitative interactions within and among taxa determine the  
29 identity of the species present in local communities. Ecologists are often interested in inferring ecological processes  
30 from patterns and determining their relative importance for the community under study [1]. During the last few  
31 years, there has been a growing interest in developing new statistical tools aimed toward ecologists and the analysis  
32 of multivariate community data (see e.g., [2]). Many of the distance-based approaches however, have a number of  
33 drawbacks, including uncertainty of selecting the most appropriate null models, low statistical power, and the lack  
34 of possibilities for making predictions [3]. One alternative, model-based framework which has become increasingly  
35 popular in community ecology is joint species distribution models (JSDMs, [4]). Such models are an extension of  
36 generalized linear mixed models (GLMMs, [5]), where multiple species are analyzed simultaneously often together  
37 with environmental variables, thereby revealing community level responses to environmental change. By incorporating  
38 both fixed and random effects, sometimes at multiple levels of biological organization, JSDMs have the capacity to  
39 assess the relative importance of processes such as environmental and biotic filtering versus stochastic variability.

40 Furthermore, with the increase of trait-based and phylogenetic data in community ecology together with the growing  
41 appreciation that species interactions are constrained by the “phylogenetic baggage” they inherit from their ancestors  
42 [6], JSDMs can further accommodate information on both species traits and phylogenetic relatedness among species  
43 [7, 8, 9, 10]. Finally, accounting for phylogenetic relatedness among species can greatly improve estimation accuracy  
44 and power when there is a phylogenetic signal in species traits and/or residual variation ([11]).

45 To model covariances between a large number of species using a standard multivariate random effect, as a stan-  
46 dard JSDM [4, 12] does, is computationally challenging; the number of parameters that needs to be estimated when  
47 assuming a completely unstructured covariance matrix increases rapidly (quadratically) with the number of species.  
48 An increasingly popular tool for overcoming this problem, which is capable of modeling such high-dimensional data,  
49 is latent factor models [13]. In community ecology, latent factor models and JSDMs have been combined to allow  
50 for a more parsimonious yet flexible way of modeling species covariances in large communities [10, 14]. Such an  
51 approach offers a number of benefits. First, latent factors provide a method of explicitly accounting for residual cor-  
52 relation. This is important because missing covariates, ecological interactions and/or spatio-temporal correlation will  
53 induce residual correlation among species, which, if not accounted for, may lead to erroneous inference. Second, latent  
54 factors facilitate model-based ordination in order to visualize and quantify the main patterns in rows and/or columns  
55 of the data [15, 16]. While traditional distance-based ordination techniques may confound location (i.e., the mean  
56 abundance) and dispersion (i.e., the variability) effects [3], model-based ordination directly models the mean-variance  
57 relationship and can therefore accurately distinguish between the two effects [17, 18]. Finally, the estimated factor  
58 loadings can be conveniently interpreted as indicating whether two species co-occur more or less often than by chance  
59 as well as the direction and strength of their co-occurrence, thus allowing a latent factor approach to robustly estimate  
60 large species-to-species co-occurrence networks [19]. Note that an important decision when fitting latent factor mod-  
61 els, is the choice of the number of latent factors. While less than five is usually sufficient for a good approximation  
62 to correlations, there is a trade-off between model complexity and the model’s capacity to capture the true correlation  
63 structure ([13]). An alternative approach is to use variable selection, which automatically shrinks less-informative  
64 latent factors to zero ([20]).

65 In parallel to community ecology, there is a growing field of microbial ecology studying both free-living and  
66 host-associated microbiota. While microbial ecologists can adopt many of the same statistical tools developed for tra-  
67 ditional multivariate abundance data (see e.g., [21]), researchers studying host-associated microbiota need to consider  
68 an additional layer of processes structuring the focal community, namely that host-associated microbiota are addition-  
69 ally shaped directly or indirectly by their hosts. For example, interactions between hosts and microbes often involve

70 long-lasting and sometimes extremely intimate relationships, where the host may have evolved the capacity to directly  
71 control the identity and/or abundance of its microbial symbionts [22, 23]. Similar to an environmental niche, the host  
72 must be viewed as a multidimensional composite of all host-specific factors driving the occurrence and/or abundance  
73 of microbes within a host—everything from broad evolutionary relationships between host species [24] to the direct  
74 production of specific biomolecules within a single host individual [25]. As a result, host-associated microbiota have  
75 a hierarchical data structure where samples are nested under one or several variables representing recorded and/or  
76 measured host-specific factors sometimes spanning multiple levels of biological organization.

77 In this article, we propose a novel extension of JSDMs to analyze host-associated microbiota, based around ex-  
78 plicitly modeling its characteristic hierarchical data structure. In doing so, our proposed model can straightforwardly  
79 accommodate and discriminate among any measured host-specific factors. Over the past few years, there has been an  
80 increase of model-based approaches aimed specifically toward the analysis of host-associated microbiota (see e.g., [12,  
81 26, 27, 28]). To our knowledge however, our proposed model is the first to explicitly and transparently account for the  
82 aforementioned hierarchical structure that is inherent in data on host-associated microbiota (Fig 1). Other key features  
83 of the proposed model, which are inherited from JSDMs and latent factor models, include: (1) parsimonious modeling  
84 of the high-dimensional correlation structures typical of host-associated microbiota; (2) model-based ordination to  
85 visualize and quantify the main patterns in the data; (3) variance partitioning to assess the explanatory power of the  
86 modeled host-specific factors and their influence in shaping the microbiota; and finally (4) co-occurrence networks to  
87 visualize OTU-to-OTU associations. Furthermore, by building our model in a probabilistic, i.e., Bayesian framework,  
88 we can straightforwardly sample from the posterior probability distribution of the correlation matrix computed by the  
89 factor loadings; this means that we can choose to look at, or further analyze the correlations that have at least e.g.,  
90 95% (or even 97% or 99%) probability.

91 We apply our proposed model to two published data sets. While we include the effect of host phylogenetic related-  
92 ness in both case studies, we illustrate the flexibility of our approach by adapting the proposed model to overdispersed  
93 counts and presence-absence responses, and study-specific meta data relevant to each case study. By utilizing recent  
94 progress in latent factor modeling, our proposed model can also assist in cases where meta data are scarce by finding  
95 latent “hidden” variables driving the microbiota.

## 96 **Methods**

97 We applied the proposed methodology to two published data sets on host-associated microbiota. Both datasets possess  
98 two main features which characterize many host-associated microbiota data, namely high dimensionality i.e., the  
99 number of OTUs is a non-negligible proportion of the number of samples, and sparsity i.e., most OTUs are rarely  
100 observed. The first data set comprise 90 samples from 20 sponge species collected in four closely located sites in  
101 the Bocas del Toro archipelago (Fig S1 for original study see [29]). The meta data contain apart from collection  
102 site, a classification of hosts into either High Microbial Abundance (HMA) or Low Microbial Abundance (LMA)  
103 sponges (hereafter termed *ecotype*). This classification is based on the abundance of microbes harbored by the host  
104 and determined by transmission electron microscopy [30]. The authors constructed a host phylogeny from 18S rRNA  
105 gene sequences (downloaded from GenBank) by implementing a relaxed-clock model in MrBayes. The data have a  
106 hierarchical structure with  $n = 90$  samples nested within  $s = 20$  host species and  $l = 4$  collection sites. Host species  
107 are then further nested under one of  $r = 2$  ecotypes. The response matrix had already been filtered to only include  
108 OTUs (defined at 97% similarity) with at least 500 reads, but we further removed OTUs with less than 20 presences  
109 across samples, resulting in  $m = 187$  modeled OTUs.

110 The second data set consists of 59 neotropical bird species with a total of 116 samples from the large intestine.  
111 Host species were collected from 12 lowland forests sites across Costa Rica and Peru (Fig S2 for original study see  
112 [31]). The meta data include bird taxonomy and several covariates—including dietary specialization, stomach contents  
113 and host habitat. The authors sequenced and used the mitochondrial locus ND2 to reconstruct the host phylogeny by  
114 implementing a partitioned GTR +  $\Gamma$  model in BEAST. Similarly to the sponge data set, this data set has a hierarchical  
115 structure with  $n = 116$  samples nested within  $s = 59$  host species and  $l = 12$  collection sites. We filtered the response  
116 matrix to include OTUs (defined at 97% similarity) with at least 50 reads and 40 presences across samples, resulting  
117 in  $m = 151$  modeled OTUs. Of the full list of covariates available, we included diet, stomach content, sex, elevation  
118 and collection site as explanatory predictor variables in our model. While diet and geography have been shown to  
119 influence the human gut microbiota (see e.g., [32, 33]), the effect of sex and elevation is less known.

## 120 **Joint species distribution models**

121 We considered two response types commonly encountered in host-associated microbiota data: counts and presence-  
122 absence. Formally, let the response matrix being modeled consist of either counts or presence-absence records of  $m$   
123 OTUs from  $n$  samples, and let  $y_{ij}$  denote the response of the  $j$ -th OTU in the  $i$ -th sample. Also, let  $\mathcal{N}(\mu, \sigma^2)$  denote

124 a univariate normal distribution with mean  $\mu$  and variance  $\sigma^2$ , and analogously, let  $\mathcal{MVN}(\boldsymbol{\mu}, \boldsymbol{\Sigma})$  denote a multivariate  
 125 normal distribution with mean vector and covariance matrix  $\boldsymbol{\Sigma}$ . We now split our model formulation up into the two  
 126 case studies/response types.

127 **Case Study 1 (Counts):** Due to the presence of overdispersion that was quadratic in nature, as confirmed by a  
 128 mean-variance plot of the OTU counts (not shown), we assumed a negative binomial distribution for the responses.  
 129 Specifically, we considered a negative binomial distribution with a quadratic mean-variance relationship for the ele-  
 130 ment  $y_{ij}$ , such that  $\text{Var}(y_{ij}) = \psi_{ij} + \phi_j \psi_{ij}^2$  where  $\phi_j$  is the OTU-specific overdispersion parameter. The mean abundance  
 131 was related to the covariates using a log-link function. Denoting the mean abundance of OTU  $j$  in sample  $i$  by  $\psi_{ij}$ ,  
 132 then we have

### Model 1

$$y_{ij} \sim \text{Negative-Binomial}(\psi_{ij}, \phi_j), \quad i = 1, \dots, n = 90, \quad j = 1, \dots, m = 187 \quad (1)$$

$$\log(\psi_{ij}) = \alpha_i + \gamma_j + \sum_{q=1}^5 Z_{iq} \lambda_{qj} + \sum_{q=1}^5 Z_{s[i]q}^H \lambda_{qj}^H, \quad q = 1, \dots, 5 \quad (2)$$

$$\alpha_i \sim \mathcal{N}(\mu(\text{host})_{s[i]}, \sigma^2(\text{sample}))$$

$$\mu(\text{host})_s = \mu(\text{ecotype})_s + \mu(\text{site})_s + \mu(\text{phylo})_s \times \theta_{\text{phylo}}, \quad s = 1, \dots, S = 20 \quad (3)$$

$$\mu(\text{ecotype})_s \sim \mathcal{N}(\mu_{r[s]}, \sigma^2(\text{ecotype}))$$

$$\mu(\text{site})_s \sim \mathcal{N}(\mu_{l[s]}, \sigma^2(\text{site}))$$

$$\boldsymbol{\mu}(\text{phylo})_s \sim \mathcal{MVN}(\mathbf{0}, \mathbf{C}(\text{phylo}))$$

$$\mu_r \sim \text{Cauchy}(0, 2.5), \quad r = 1, \dots, R = 2$$

$$\mu_l \sim \text{Cauchy}(0, 2.5), \quad l = 1, \dots, L = 4$$

$$\gamma_j \sim \text{Cauchy}(0, 2.5)$$

$$\theta_{\text{phylo}} \sim \text{Exp}(0.1)$$

133 To clarify the above formulation,  $s$ ,  $r$  and  $l$  index effects that are attributed to the  $S = 20$  host species,  $R = 2$   
 134 ecotypes and  $L = 4$  sites respectively. For instance, “ $s[i]$ ” and “ $r[s]$ ” denote “sample  $i$  nested within host species  $s$ ”  
 135 and “host species  $s$  nested within ecotype  $r$ ”, respectively (Fig 1). In equation (2), the quantities  $\alpha_i$  and  $\gamma_j$  represent  
 136 sample and OTU-specific effects, respectively. The former adjusts for differences in sequencing depth among samples,  
 137 while the latter controls for differences in OTU total abundance. The inclusion of  $\alpha_i$  serves two main purposes. First

138 and foremost, including  $\alpha_i$  allows us to account for the hierarchical data structure and its effect on sample total  
139 abundance specifically. In particular, to account for sample  $i$  being nested within host species  $s$  (which are further  
140 nested within ecotype  $r$ ) and site  $l$ , the sample effects  $\alpha_i$  are drawn from a normal distribution with a mean that is a  
141 linear function of three host-specific effects: host ecotype  $\mu(\text{ecotype})$ ; host collection site  $\mu(\text{site})$ ; and host phylogeny  
142  $\mu(\text{phylo})$ . Furthermore, the host ecotype  $\mu(\text{ecotype})$  and host collection site  $\mu(\text{site})$  effects are themselves drawn  
143 from a normal distribution with an ecotype and site-specific mean, respectively. Second, the inclusion of  $\alpha_i$  means  
144 that the resulting ordinations constructed by the latent factors on the sample  $Z_{iq}$  and host species  $Z_{s[i]q}^H$  level are in  
145 terms of species composition only, as opposed to a composite of abundance and composition if the site effects were  
146 not included in the formulation. We included five latent factors at both the sample and host species level, and both  
147  $Z_{iq}$  and  $Z_{s[i]q}^H$  were assigned standard normal priors  $\mathcal{N}(0,1)$  with the assumption of zero mean and unit variance  
148 to fix the location and scale (see Chapter 5, [34]). Furthermore, to address rotational variance, the upper triangular  
149 component of both loading matrices (i.e., sample  $\lambda$  and host species  $\lambda^H$  level) are fixed to zero with the diagonals  
150 constrained to be positive [35]. As recommended by Polson and Scott [36], and analogous to the prior distributions  
151 we use for the mean  $\mu_r$  and  $\mu_l$ , we used a weakly informative prior in the form of a half-Cauchy distribution with a  
152 center and scale equal to 0 and 2.5 for the overdispersion parameter  $\psi$ . Moreover, following Gelman et al. [37], we  
153 used the same distribution with location and scale equal to 0 and 1 as prior information on the variance parameters:  
154  $\sigma^2(\text{sample})$ ;  $\sigma^2(\text{ecotype})$ ; and  $\sigma^2(\text{site})$ . Based on our empirical investigation, we found that the use of such priors  
155 stabilized the MCMC sampling substantially without introducing too much prior information, compared to using  
156 more uninformative prior distributions. Lastly, the quantity  $C(\text{phylo})$  corresponds to a phylogenetic correlation matrix  
157 constructed from the host phylogeny by assuming Brownian motion evolution such that the covariances between host  
158 species are proportional to their shared branch length from the most recent common ancestor [38]. The phylogenetic  
159 parameter  $\theta_{\text{phylo}}$  quantifies variance that can be attributed to the phylogenetic effect, and is drawn from an exponential  
160 distribution with a rate parameter of 0.1. Similar to the half-Cauchy priors, this prior distribution provides a weak level  
161 of regularization—a rate parameter of 0.1 gives a prior mean of 10, thus preventing the estimated variance of getting  
162 implausibly large.

163 **Case Study 2 (Presence-absence):** We modelled the presence ( $y_{ij} = 1$ ) or absence ( $y_{ij} = 0$ ) of OTU  $j$  in sample  
164  $i$  using probit regression, implemented via the indicator function  $1_{z_{ij}>0}$  where the latent score is normally distributed  
165 with the mean equal to a linear function of the covariates and latent factors, and variance set equal to one. The  
166 hierarchical model was set up as follows:

## Model 2

$$z_{ij} \sim \alpha_i + L_{ij} + \sum_{q=1}^5 Z_{iq} \lambda_{qj}, \quad i = 1, \dots, n = 116, \quad j = 1, \dots, m = 151, \quad q = 1, \dots, 5 \quad (4)$$

$$L_{ij} = \gamma_j + \sum_{k=1}^5 X_{ik} \beta_{kj}, \quad k = 1, \dots, 5 \quad (5)$$

$$\alpha_i \sim \mathcal{N}(\mu(\text{host})_{s[i]}, \sigma^2(\text{sample}))$$

$$\mu(\text{host})_s = \mu(\text{non-phylo})_s + \mu(\text{phylo})_s \times \theta_{\text{phylo}}, \quad s = 1, \dots, S = 59 \quad (6)$$

$$\mu(\text{non-phylo})_s \sim \mathcal{N}(\mu_s, \sigma^2(\text{host}))$$

$$\boldsymbol{\mu}(\text{phylo})_s \sim \mathcal{MVN}(\mathbf{0}, \mathbf{C}(\text{phylo}))$$

$$\mu_s \sim \text{Cauchy}(0, 2.5)$$

$$\gamma_j \sim \text{Cauchy}(0, 2.5)$$

$$\psi_{ij} \sim \text{half-Cauchy}(0, 2.5)$$

$$\sigma^2(\text{sample}) \sim \text{half-Cauchy}(0, 1)$$

$$\theta_{\text{phylo}} \sim \text{Exp}(0.1)$$

167 While the above description is largely the same as that of *Model 1*, we also included here a linear predictor  $L_{ij}$  to  
 168 model the effects of five available covariates (represented by the model matrix  $X_{ik}; k = 1, \dots, 5$ ) on species composition  
 169 (equation (5)). The linear predictor  $L_{ij}$  thus acts to explain covariation between OTUs due to the measured explanatory  
 170 predictor variables, while the latent factors account for the remaining, residual covariation. Similarly to *Model 1*,  
 171 including  $\alpha_i$  means that the covariation between OTUs is in terms of species composition only. By drawing the sample  
 172 effects  $\alpha_i$  from a normal distribution with a mean that is a linear function of both non-phylogenetic  $\mu(\text{non-phylo})$   
 173 and phylogenetic  $\mu(\text{phylo})$  host effects (equation (6)), we account for the hierarchical structure present in the data.  
 174 Furthermore, from the loading matrix  $\boldsymbol{\lambda}$ , we computed a covariance matrix as  $\boldsymbol{\Omega} = \boldsymbol{\lambda}\boldsymbol{\lambda}^\top$ , which we subsequently  
 175 convert to a correlation matrix for studying the OTU-to-OTU co-occurrence network.

176 For both case studies, we used Markov Chain Monte Carlo (MCMC) to estimate the models via JAGS [39] and  
 177 the `runjags` package [40] in R [41]. For each model, we ran one chain with dispersed initial values for 300,000  
 178 iterations saving every 10<sup>th</sup> sample and discarding the first 25% of samples as burn-in. We evaluated convergence of  
 179 model parameters by visually inspecting trace and density plots using the R packages `coda` [42] and `mcmcplots` [43],  
 180 as well as using the Geweke diagnostic [44].



## 181 Variance partitioning

182 To discriminate among the relative contributions of the various factors driving covariation in the JSDMs, we partition  
183 the explained variance by the row effects ( $\alpha_i$ ), the linear predictor ( $L_{ij}$ ), and the loadings ( $\lambda_{qj}$  and  $\lambda_{qj}^H$ ) into compo-  
184 nents reflecting sample and host level effects. Such a variance decomposition is analogous to the sum-of-squares and  
185 variance decompositions seen in Analysis of Variance (ANOVA) and linear mixed models ([45]). Depending on the  
186 response type, the row effects capture variance in relative abundance (*Model 1*) or species richness (*Model 2*), while  
187 the linear predictor and the loadings capture variance in species composition. As mention above, when the linear  
188 predictor is included in (*Model 2*), the loadings capture residual variation not accounted for by the modeled covariates.  
189 Variance partitioning therefore allows us to asses the explanatory power of the hierarchical data structure, and mea-  
190 sured covariates including “hidden” factors, and how influential each of them are in structuring the host-associated  
191 microbiota ([10]).

We now discuss in more detail how we partition the explained variance into components attributed to the row effects ( $\alpha_i$ ) for *Model 1*, and the loadings ( $\lambda_{qj}$ ) together with the linear predictor ( $L_{ij}$ ) for *Model 2*. Let  $V_{\text{total}}$  denote the total variance of the  $\alpha_i$ , while  $V_{\text{sample}}$ ,  $V_{\text{ecotype}}$ ,  $V_{\text{site}}$  and  $V_{\text{phylo}}$  denote the variances for the sample, host ecotype, host collection site and host phylogeny, respectively. Then for Case Study 1 we have,

$$\begin{aligned} V_{\text{total}} &= V_{\text{sample}} + V_{\text{ecotype}} + V_{\text{sites}} + V_{\text{phylo}}, & \text{where} \\ V_{\text{sample}} &= \sigma^2(\text{sample}) \\ V_{\text{ecotype}} &= \sigma^2(\text{ecotype}) \\ V_{\text{site}} &= \sigma^2(\text{site}) \\ V_{\text{phylo}} &= \theta_{\text{phylo}}^2 \end{aligned}$$

and for Case Study 2 we have,

$$V_{\text{total}} = V_{\text{linpred}} + V_{\text{residual}} + V_{\text{sample}} + V_{\text{non-phylo}} + V_{\text{phylo}}, \text{ where,}$$

$$V_{\text{linpred}_j} = \text{var}(\text{Diet}_i \times \beta_{j1}) + \text{var}(\text{StomachContents}_i \times \beta_{j2}) + \text{var}(\text{Sex}_i \times \beta_{j3}) + \text{var}(\text{Elevation}_i \times \beta_{j4}) + \text{var}(\text{Site}_i \times \beta_{j5})$$

$$V_{\text{residual}} = \text{diag}(\mathbf{\Omega})$$

$$V_{\text{sample}} = \sigma^2(\text{sample})$$

$$V_{\text{non-phylo}} = \sigma^2(\text{non-phylo})$$

$$V_{\text{phylo}} = \sigma^2(\text{phylo})$$

192 In the second partitioning, the quantity  $V_{\text{linpred}}$  represents the variance explained by the linear predictor  $L_{ij}$ , the  
193  $V_{\text{residual}}$  represents the residual variance not accounted for by the modeled predictor variables i.e., as explained by  
194 the diagonal elements of the residual covariance matrix  $\mathbf{\Omega}$ , and finally the  $V_{\text{sample}}$ ,  $V_{\text{non-phylo}}$  and  $V_{\text{phylo}}$  to variance  
195 attributed to the hierarchy present on the row effects  $\alpha_{ij}$ .

## 196 Results

197 Below we present the main results for each case study. We used the 95% highest density interval (HDI) as a measure  
198 of statistical significance. That is, if a parameter or a pairwise parameter comparison excludes zero, then we conclude  
199 that the posterior probability of the difference being significantly different from zero exceeds 95%.

### 200 Case study 1

201 We applied *Model 1* to data on sponge host-associated microbiota [29]. The fitted model revealed that more than 86%  
202 of the variation in relative abundance among samples could be attributed to processes operating on the host-species  
203 level (Table 1; Fig 2). More specifically, 57% of this variation was explained by host phylogenetic relatedness, even  
204 though the 95% HDI for the phylogenetic effects did not exclude zero for any of the host species. While this suggests  
205 the presence of a phylogenetic signal in one or more host traits affecting microbial abundance and/or occurrence, it also  
206 indicates that no particular host species or host species clade have a stronger signal than the rest. Easson and Thacker  
207 [29] used the Bloomberg's K statistic and found a significant signal of the host phylogeny on the inverse Simpson's  
208 index. This index measures the diversity of a community, but is strongly influenced by the relative abundance of its  
209 most common species ([46]). The authors specifically noted that host species *Aiolochoira crassa*, *Aplysina cauliformis*

210 and *Aplysina fulva* from the order Verongida, along with host *Erylus formosus* from the order Astrophorida had higher  
211 values of this index compared to the rest of the host species. Similarly, we found that the same four hosts harbored more  
212 abundant (Fig 2) and distinctively different microbiotas than the other host species (Fig S3). Pairwise comparisons of  
213 these four hosts showed that *A. crassa* harbored markedly different microbial composition compared to its two closest  
214 relatives *A. cauliformis* and *A. fulva* (Table S1; Table S2). These three hosts were nonetheless collected at the same  
215 site. The two species from the genus *Aplysina* on the other hand, harbored very similar microbiota composition to that  
216 of host *E. formosus* even if they were collected some 17,000 km apart.

217 Host ecotype and collection site roughly explained two thirds of the remaining variation in relative abundance  
218 (Table 1). Furthermore, the host species level explained 39% of the variation beyond differences in relative abundance,  
219 with the remaining variation explained by the latent factors on the sample level. While samples did not cluster based  
220 on ecotype or sites, samples belonging to HMA hosts generally formed tighter clusters compared to samples from  
221 LMA hosts (Fig 3). Note however that because the sampling scheme in the original study confounded host ecotype  
222 and collection site, it is impossible to fully disentangle the two.

## 223 Case study 2

224 Fitting *Model 2* to the data on neotropical bird gut-associated microbiota (31) revealed that only 9% of the variation in  
225 species richness among samples could be explained by processes acting on the host species level, including processes  
226 related to the host phylogeny. The remaining 91% of this variation was captured by processes operating on the sample  
227 level (Table 2). Of the total variance in species occurrence, variation in species richness only accounted for, on average,  
228 about 17%. The modeled predictor variables explained 69% of the total variance, and varied from a minimum of less  
229 than 0.01% to a maximum of 99.7% across all OTUs (Figure 5). The predictor variable that had the largest average  
230 effect on microbiota composition was collection site (21.33%, Table 2). None of the estimated regression coefficients  
231 for the predictor variables excluded zero (Figure S7). Furthermore, the ordination plots constructed from the the first  
232 two latent factors did not reveal any obvious clustering by e.g., diet (broad dietary specialization), taxonomy at the  
233 order level or collection site (Fig S4; S5; 6).

234 We ran an edge betweenness community detection algorithm (47) on the correlation matrix computed from the  
235 loading matrix  $\lambda$  where links represent positive and negative co-occurrences with at least 95% posterior probability.  
236 We colored nodes by their bacterial taxonomic affiliation at the phylum level. This revealed a large tightly knit cluster  
237 with well connected nodes in the centre and less connected nodes in the periphery of the cluster. The network displayed  
238 equal proportion of positive and negative co-occurrences, and with no apparent clustering of OTUs belonging to certain

239 phyla (Figure S6). Caution should, however, be taken when interpreting statistical interactions: these are residual  
240 species-to-species co-occurrences that can only be considered as hypotheses for ecological interactions, and without  
241 additional biological information it is impossible to definitively confirm or assess their nature ([19, 48, 49]).

## 242 Discussion

243 In this paper, we have developed a joint species distribution model (JSDM) aimed towards analyzing host-associated  
244 microbiota data. The present work builds upon and extends existing JSDMs by specifically targeting the hierarchical  
245 structure implicit in host-associated microbiota studies, while also including several other features that are attractive  
246 for analyzing such data. First, we have shown how overdispersed counts and presence-absence data, two common  
247 features of host-microbiota data can be modeled under a single framework by implementing a negative binomial and  
248 a probit distribution with the appropriate link function. Furthermore, we have utilized recent progress in latent factor  
249 modeling in order to represent the high-dimensional nature of host-microbiota data as a rank-reduced covariance  
250 matrix, thus making the estimation of large OTU-to-OTU covariance matrices computationally tractable. By doing  
251 so, we have also demonstrated how latent factors, both alone or together with measured covariates, can be used for  
252 variance partitioning and further visualized as ordinations and co-occurrence networks. Lastly, depending on the  
253 modelled response function, we have illustrated that the variance partitioning of the hierarchy present on the rows can  
254 be represented in terms of either relative abundance or species richness.

255 We adapted our proposed model to make use of two published data sets on host-associated microbiota. Although  
256 our goal was not to compare the results from these two case studies, such a systematic comparison can be done using  
257 a model-based approach like ours. Broadly, the data analyzed here suggest that markedly different processes are  
258 shaping the microbiota harbored by these different host organisms. Individually, the main results from each of our two  
259 models were generally in agreement with the results reported in their respective original study; for example, *Model*  
260 *1* identified the same four host species reported by Easson and Thacker [29] to have more abundant and distinctively  
261 different microbiotas compared to the other analyzed hosts. Similarly to Hird et al. [31], the ordinations produced  
262 by *Model 2* did not cluster by host diet, host taxonomy nor collection site. By partitioning variance among fixed and  
263 random effects, *Model 2* further showed that there was substantial variation across OTUs in terms of which predictor  
264 variables explained the most variance.

265 While distance-based methods such as PERMANOVA still remains one of the most widely used non-parametric  
266 methods to analyze host-associated microbiota data, model-based approaches are increasingly recognized to outper-

267 form such analyses (see e.g., [3, 17, 27]), and we see our proposed model as making a strong case for further empirical  
268 comparisons between distanced-based and model-based approaches to analyzing microbiota data.

269 There are a number of extensions one could make to the proposed model. Perhaps the most important of these  
270 stems from the growing recognition that high-throughput DNA sequencing produces compositional data, i.e., non-  
271 negative counts with an arbitrary sum imposed by the sequencing platform, which can produce spurious correlations  
272 if not properly accounted for (see e.g., [50, 51, 52]). Because of the log-link function used in *Model 1*, it is possible  
273 to parameterize this model and regard it in terms of compositional effects (see [53] and also noting the fact that the  
274 negative binomial distribution can itself be parameterized as a hierarchical Poisson model with Gamma distributed  
275 random effects), although for ease of estimation and interpretation we chose to adopt the standard negative binomial  
276 parameterization. This topic remains an area of active research, and there are currently several model-based methods  
277 (see e.g., [54, 55, 56, 57]) to infer co-occurrence networks, each with its own set of assumptions—it is not yet conclu-  
278 sive that any one of these methods outperforms the rest. Other model extensions and modifications can also be made  
279 in order to answer specific ecological questions of interest. For example, whether closely related host species harbor  
280 closely related microbes (i.e., host-microbiota phylogenetic congruence), or whether similarity among host-associated  
281 microbiota decreases as a function of increasing geographical distance or social connectance between hosts. Such  
282 questions may be answered for instance, by incorporating a phylogenetic effect acting on the columns of the response  
283 matrix, and by implementing a Gaussian process model that quantifies the degree of spatial and/or social autocorre-  
284 lation between hosts, respectively. These two “flavors” of JSDMs and mixed models more generally have previously  
285 been considered in community ecology, both separately [58, 59, 60] and combined [8], although both computation  
286 and successful estimation and inference of all the model parameters remain a major issue especially with the high-  
287 dimensional nature of host-associated microbiota data. In summary, while substantial methodological advances have  
288 been made over the past few years in developing an extensive model framework for community ecological data, to  
289 date there exists no similar unifying framework for modeling host-associated microbiota which is directly tailored to  
290 the hierarchical and correlation structures present as well as questions of interest specific to such data. Our proposed  
291 model, which explicitly accounts for the host’s effect in structuring its microbiota, takes us closer to that goal.

## 292 **Code and Data Availability**

293 All code and data will be available on [Open Science Framework](#).

## 294 References

- 295 [1] Mark Vellend. “Conceptual Synthesis in Community Ecology”. In: *The Quarterly Review of Biology* 85.2  
296 (2010), pp. 183–206. DOI: [10.1086/652373](https://doi.org/10.1086/652373).
- 297 [2] P. Legendre and L. Legendre. *Numerical Ecology*. Developments in environmental modelling. Elsevier, 2012.  
298 ISBN: 9780444538680.
- 299 [3] David I. Warton, Stephen T. Wright, and Yi Wang. “Distance-based multivariate analyses confound location  
300 and dispersion effects”. In: *Methods in Ecology and Evolution* 3.1 (2012), pp. 89–101.
- 301 [4] Laura J. Pollock et al. “Understanding co-occurrence by modelling species simultaneously with a Joint Species  
302 Distribution Model (JSDM)”. In: *Methods in Ecology and Evolution* 5.5 (2014), pp. 397–406.
- 303 [5] Benjamin M. Bolker et al. “Generalized linear mixed models: a practical guide for ecology and evolution”. In:  
304 *Trends in Ecology & Evolution* 24.3 (2009), pp. 127–135. ISSN: 0169-5347. DOI: [10.1016/j.tree.2008.  
305 10.008](https://doi.org/10.1016/j.tree.2008.10.008).
- 306 [6] John N Thompson. *The coevolutionary process*. University of Chicago Press, 1994.
- 307 [7] Anthony R. Ives and Matthew R. Helmus. “Phylogenetic metrics of community similarity.” In: *The American  
308 naturalist* 176.5 (2010), E128–E142.
- 309 [8] Arne Kaldhusdal et al. “Spatio-phylogenetic multispecies distribution models”. In: *Methods in Ecology and  
310 Evolution* 6.2 (2015), pp. 187–197. ISSN: 2041-210X. DOI: [10.1111/2041-210X.12318](https://doi.org/10.1111/2041-210X.12318).
- 311 [9] Tuomas Aivelo and Anna Norberg. “Parasite-microbiota interactions potentially affect intestinal communities  
312 in wild mammals”. In: *bioRxiv* (2016). DOI: [10.1101/076059](https://doi.org/10.1101/076059).
- 313 [10] Otso Ovaskainen et al. “How to make more out of community data? A conceptual framework and its implemen-  
314 tation as models and software”. In: *Ecology Letters* (2017). ISSN: 1461-0248. DOI: [10.1111/ele.12757](https://doi.org/10.1111/ele.12757).
- 315 [11] Daijiang Li and Anthony R. Ives. “The statistical need to include phylogeny in traitbased analyses of community  
316 composition”. In: *Methods in Ecology and Evolution* 8.10 (2017), pp. 1192–1199. DOI: [10.1111/2041-  
317 210X.12767](https://doi.org/10.1111/2041-210X.12767).
- 318 [12] Fan Xia et al. “A Logistic Normal Multinomial Regression Model for Microbiome Compositional Data Analy-  
319 sis”. In: *Biometrics* 69.4 (2013), pp. 1053–1063. DOI: [10.1111/biom.12079](https://doi.org/10.1111/biom.12079).
- 320 [13] David I. Warton et al. “So Many Variables: Joint Modeling in Community Ecology”. In: *Trends in Ecology and  
321 Evolution* 30 (2015), pp. 1–14.

- 322 [14] Andrew D. Letten et al. “Fine-scale hydrological niche differentiation through the lens of multi-species co-  
323 occurrence models”. In: *Journal of Ecology* 103.5 (2015), pp. 1264–1275.
- 324 [15] Francis K.C. Hui. “boral–Bayesian Ordination and Regression Analysis of Multivariate Abundance Data in R”.  
325 In: *Methods in Ecology and Evolution* (2016). DOI: <https://doi.org/10.1111/2041-210X.12514>.
- 326 [16] Francis K.C. Hui. “Model-based simultaneous clustering and ordination of multivariate abundance data in ecol-  
327 ogy”. In: *Computational Statistics & Data Analysis* 105 (2017), pp. 1–10. DOI: <https://doi.org/10.1016/j.csda.2016.07.008>.
- 328
- 329 [17] Francis K.C. Hui et al. “Model-based approaches to unconstrained ordination”. In: *Methods in Ecology and*  
330 *Evolution* 6.4 (2015), pp. 399–411. DOI: <https://doi.org/10.1111/2041-210X.12236>.
- 331 [18] Michael B. Sohn and Hongzhe Li. “A GLM-based latent variable ordination method for microbiome samples”.  
332 In: *Biometrics* (). ISSN: 1541-0420. DOI: [10.1111/biom.12775](https://doi.org/10.1111/biom.12775).
- 333 [19] Otso Ovaskainen et al. “Using latent variable models to identify large networks of species-to-species associ-  
334 ations at different spatial scales”. In: *Methods in Ecology and Evolution* 7.5 (2016), pp. 549–555. DOI: [10.1111/2041-210X.12501](https://doi.org/10.1111/2041-210X.12501).
- 335
- 336 [20] A. Bhattacharya and D. B. Dunson. “Sparse Bayesian infinite factor models”. In: *Biometrika* (2011), pp. 291–  
337 306. DOI: [10.1093/biomet/asr013](https://doi.org/10.1093/biomet/asr013).
- 338 [21] Miklós Bálint et al. “Millions of reads, thousands of taxa: microbial community structure and associations  
339 analyzed via marker genes”. In: *FEMS Microbiology Reviews* 40.5 (2016), p. 686. DOI: [10.1093/femsre/](https://doi.org/10.1093/femsre/fuw017)  
340 [fuw017](https://doi.org/10.1093/femsre/fuw017).
- 341 [22] Roeland L. Berendsen, Corné M.J. Pieterse, and Peter A.H.M. Bakker. “The rhizosphere microbiome and plant  
342 health”. In: *Trends in Plant Science* 17.8 (2012), pp. 478–486. DOI: [10.1016/j.tplants.2012.04.](https://doi.org/10.1016/j.tplants.2012.04.001f)  
343 [001f](https://doi.org/10.1016/j.tplants.2012.04.001f).
- 344 [23] Margaret McFall-Ngai et al. “Animals in a bacterial world, a new imperative for the life sciences”. In: *Proceed-*  
345 *ings of the National Academy of Sciences* 110.9 (2013), pp. 3229–3236.
- 346 [24] Mathieu Groussin et al. “Unraveling the processes shaping mammalian gut microbiomes over evolutionary  
347 time”. In: *Nature Communications* 8 (2017), 14319EP.
- 348 [25] Shirong Liu et al. “The Host Shapes the Gut Microbiota via Fecal MicroRNA”. In: *Cell Host & Microbe* 19.1  
349 (2016), pp. 32–43. ISSN: 1931-3128. DOI: [10.1016/j.chom.2015.12.005](https://doi.org/10.1016/j.chom.2015.12.005).

- 350 [26] Lizhen Xu, Andrew D. Paterson, and Wei Xu. “Bayesian latent variable models for hierarchical clustered count  
351 outcomes with repeated measures in microbiome studies”. In: *Genetic Epidemiology* 41.3 (2017), pp. 221–232.  
352 ISSN: 1098-2272. DOI: [10.1002/gepi.22031](https://doi.org/10.1002/gepi.22031).
- 353 [27] Neal S. Grantham et al. *MIMIX: a Bayesian Mixed-Effects Model for Microbiome Data from Designed Experi-*  
354 *ments*. 2017. eprint: [arXiv:1703.07747](https://arxiv.org/abs/1703.07747).
- 355 [28] Xinyan Zhang et al. “Negative binomial mixed models for analyzing microbiome count data”. In: *BMC Bioin-*  
356 *formatics* 18.1 (2017), p. 4. ISSN: 1471-2105. DOI: [10.1186/s12859-016-1441-7](https://doi.org/10.1186/s12859-016-1441-7).
- 357 [29] C G Easson and R W Thacker. “Phylogenetic signal in the community structure of host-specific microbiomes  
358 of tropical marine sponges”. In: *Front Microbiol* 5.October (2014), p. 532. URL: [http://www.ncbi.nlm.](http://www.ncbi.nlm.nih.gov/pubmed/25368606)  
359 [nih.gov/pubmed/25368606](http://www.ncbi.nlm.nih.gov/pubmed/25368606).
- 360 [30] Volker Gloeckner et al. “The HMA-LMA Dichotomy Revisited: an Electron Microscopical Survey of 56 Sponge  
361 Species.” In: *The Biological bulletin* 227.1 (2014), pp. 78–88.
- 362 [31] Sarah M. Hird et al. “Comparative Gut Microbiota of 59 Neotropical Bird Species”. In: *Frontiers in Microbiol-*  
363 *ogy* 6 (2015), p. 1403. DOI: [10.3389/fmicb.2015.01403](https://doi.org/10.3389/fmicb.2015.01403).
- 364 [32] Brian D. Muegge et al. “Diet drives convergence in gut microbiome functions across mammalian phylogeny  
365 and within humans”. In: *Science* 332.6032 (2011), pp. 970–974.
- 366 [33] Tanya Yatsunenko et al. “Human gut microbiome viewed across age and geography.” In: *Nature* 486.7402  
367 (2012), pp. 222–227. URL: <http://f1000.com/717247854>.
- 368 [34] A. Skrondal and S. Rabe-Hesketh. *Generalized Latent Variable Modeling: Multilevel, Longitudinal, and Struc-*  
369 *tural Equation Models*. Chapman & Hall/CRC Interdisciplinary Statistics. CRC Press, 2004. ISBN: 9780203489437.  
370 URL: <https://books.google.com/books?id=YUpDqCzb-WMC>.
- 371 [35] John Geweke and Guofu Zhou. “Measuring the price of the Arbitrage Pricing Theory”. In: 9.2 (1996), pp. 557–  
372 587. URL: <http://www.jstor.org/stable/2962214>.
- 373 [36] Nicholas G. Polson and James G. Scott. “On the Half-Cauchy Prior for a Global Scale Parameter”. In: *Bayesian*  
374 *Analysis* 7.4 (Dec. 2012), pp. 887–902. DOI: [10.1214/12-BA730](https://doi.org/10.1214/12-BA730).
- 375 [37] Andrew Gelman et al. “A Weakly Informative Default Prior Distribution for Logistic and Other Regression  
376 Models”. In: 2.4 (2008), pp. 1360–1383. ISSN: 19326157.



- 377 [38] Joseph Felsenstein. “Phylogenies and the Comparative Method”. In: *The American Naturalist* 125.1 (1985),  
378 pp. 1–15.
- 379 [39] Martyn Plummer. *JAGS: A program for analysis of Bayesian graphical models using Gibbs sampling*. 2003.
- 380 [40] M. J. Denwood. “runjags: An R package providing interface utilities, model templates, parallel computing  
381 methods and additional distributions for MCMC models in JAGS”. In: *Journal of Statistical Software* (in press).  
382 URL: <http://runjags.sourceforge.net>.
- 383 [41] R Core Team. *R: A Language and Environment for Statistical Computing*. R Foundation for Statistical Comput-  
384 ing. Vienna, Austria, 2016.
- 385 [42] Martyn Plummer et al. “CODA: Convergence Diagnosis and Output Analysis for MCMC”. In: *R News* 6.1  
386 (2006), pp. 7–11.
- 387 [43] Curtis S. McKay. “Create Plots from MCMC Output”. In: *R News* (2015).
- 388 [44] John F. Geweke. *Evaluating the accuracy of sampling-based approaches to the calculation of posterior mo-  
389 ments*. Clarendon Press, Oxford, UK, 1991.
- 390 [45] Shinichi Nakagawa and Holger Schielzeth. “A general and simple method for obtaining R<sup>2</sup> from generalized  
391 linear mixed-effects models”. In: *Methods in Ecology and Evolution* 4.2 (2013), pp. 133–142.
- 392 [46] Bart Haegeman et al. “Only Simpson Diversity can be Estimated Accurately from Microbial Community Fin-  
393 gerprints”. In: *Microbial Ecology* 68.2 (2014), pp. 169–172. DOI: [10.1007/s00248-014-0394-5](https://doi.org/10.1007/s00248-014-0394-5).
- 394 [47] Gabor Csardi and Tamas Nepusz. “The igraph software package for complex network research”. In: *InterJour-  
395 nal Complex Systems* (2006), p. 1695. URL: <http://igraph.org>.
- 396 [48] Gleb Tikhonov et al. “Using joint species distribution models for evaluating how species-species associations  
397 depend on the environmental context”. In: *Methods in Ecology and Evolution* 8.4 (2017), pp. 443–452. DOI:  
398 [10.1111/2041-210X.12723](https://doi.org/10.1111/2041-210X.12723).
- 399 [49] Pollock L.J. Zurell D. and W. Thuiller. “Do joint species distribution models reliably detect interspecific inter-  
400 actions from co occurrence data in homogenous environments?” In: *Ecography* (). DOI: [10.1111/ecog.  
401 03315](https://doi.org/10.1111/ecog.03315).
- 402 [50] Hongzhe Li. “Microbiome, Metagenomics, and High-Dimensional Compositional Data Analysis”. In: *Annual  
403 Review of Statistics and Its Application* 2.1 (2015), pp. 73–94. DOI: [10.1146/annurev-statistics-  
404 010814-020351](https://doi.org/10.1146/annurev-statistics-010814-020351).

- 405 [51] Matthew C.B. Tsilimigras and Anthony A. Fodor. “Compositional data analysis of the microbiome: fundamen-  
406 tals, tools, and challenges”. In: *Annals of Epidemiology* 26.5 (2016), pp. 330–335. DOI: [https://doi.org/](https://doi.org/10.1016/j.annepidem.2016.03.002)  
407 [10.1016/j.annepidem.2016.03.002](https://doi.org/10.1016/j.annepidem.2016.03.002).
- 408 [52] Gregory B. Gloor et al. “Microbiome Datasets Are Compositional: And This Is Not Optional”. In: *Frontiers in*  
409 *Microbiology* 8 (2017), p. 2224. DOI: [10.3389/fmicb.2017.02224](https://doi.org/10.3389/fmicb.2017.02224).
- 410 [53] David I. Warton and Peter Guttorp. “Compositional analysis of overdispersed counts using generalized esti-  
411 mating equations”. In: *Environmental and Ecological Statistics* 18.3 (2011), pp. 427–446. DOI: [10.1007/](https://doi.org/10.1007/s10651-010-0145-9)  
412 [s10651-010-0145-9](https://doi.org/10.1007/s10651-010-0145-9).
- 413 [54] Jonathan Friedman and Eric J. Alm. “Inferring Correlation Networks from Genomic Survey Data”. In: *PLOS*  
414 *Computational Biology* 8.9 (Sept. 2012), pp. 1–11. DOI: [10.1371/journal.pcbi.1002687](https://doi.org/10.1371/journal.pcbi.1002687).
- 415 [55] Huaying Fang et al. “CCLasso: correlation inference for compositional data through Lasso”. In: *Bioinformatics*  
416 31.19 (2015), pp. 3172–3180. DOI: [10.1093/bioinformatics/btv349](https://doi.org/10.1093/bioinformatics/btv349).
- 417 [56] Zachary D. Kurtz et al. “Sparse and Compositionally Robust Inference of Microbial Ecological Networks”. In:  
418 *PLOS Computational Biology* 11.5 (May 2015), pp. 1–25. DOI: [10.1371/journal.pcbi.1004226](https://doi.org/10.1371/journal.pcbi.1004226).
- 419 [57] Emma Schwager et al. “A Bayesian method for detecting pairwise associations in compositional data”. In:  
420 *PLOS Computational Biology* 13.11 (Nov. 2017), pp. 1–21. DOI: [10.1371/journal.pcbi.1005852](https://doi.org/10.1371/journal.pcbi.1005852).
- 421 [58] Anthony R. Ives and Matthew R. Helmus. “Generalized linear mixed models for phylogenetic analyses of  
422 community structure”. In: *Ecological Monographs* 81.3 (2011), pp. 511–525. DOI: [10.1890/10-1264.1](https://doi.org/10.1890/10-1264.1).
- 423 [59] Otso Ovaskainen et al. “Uncovering hidden spatial structure in species communities with spatially explicit joint  
424 species distribution models”. In: *Methods in Ecology and Evolution* (2015). DOI: [https://doi.org/10.](https://doi.org/10.1111/2041-210X.12502)  
425 [1111/2041-210X.12502](https://doi.org/10.1111/2041-210X.12502).
- 426 [60] James T. Thorson et al. “Spatial factor analysis: A new tool for estimating joint species distributions and cor-  
427 relations in species range”. In: *Methods in Ecology and Evolution* (2015). DOI: [https://doi.org/10.](https://doi.org/10.1111/2041-210X.12359)  
428 [1111/2041-210X.12359](https://doi.org/10.1111/2041-210X.12359).

Table 1: Variation explained by the hierarchy present on  $\alpha_i$ , i.e., the host effects  $\mu(\text{host})_s$ .

|           |        |
|-----------|--------|
| Phylogeny | 57.09% |
| Ecotype   | 14.58% |
| Site      | 14.51% |
| Sample    | 13.82% |

Table 2: Variation attributed to the linear predictor  $L_{ij}$ , the residual variation captured the diagonal elements of the residual covariance matrix  $\Omega$ , and by the hierarchy present on the row effects  $\alpha_{ij}$ , i.e., the host effects  $\mu(\text{host})_s$ .

|                  |        |
|------------------|--------|
| Collection site  | 21.33% |
| Stomach contents | 16.13% |
| Elevation        | 15.97% |
| Diet             | 13.59% |
| Sex              | 2.12%  |
| Residuals        | 13.89% |
| Sample           | 15.5%  |
| Non-Phylogeny    | 0.65%  |
| Phylogeny        | 0.82%  |

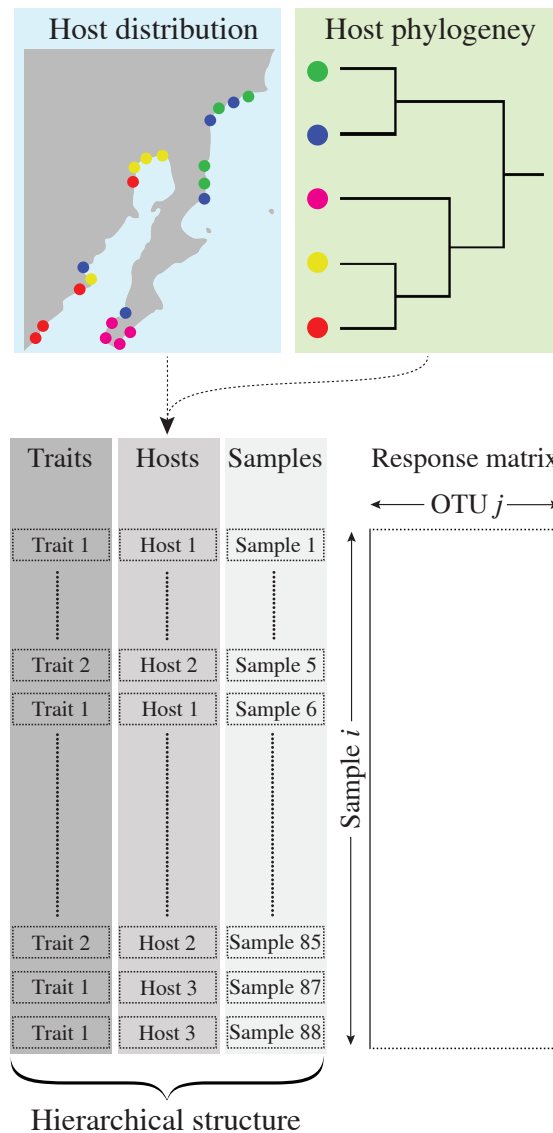

Figure 1: Host-associated microbiota data have a hierarchical data structure. In this example, samples are nested within host species which in turn are nested under species traits. As there are also data on the host's geographical distribution, host species can be further nested within observation/collection sites. Additional data that are often available is the host species phylogeny. The proposed model extension can straightforwardly accommodate for this hierarchical data structure and discriminate their importance in structuring the microbiota.

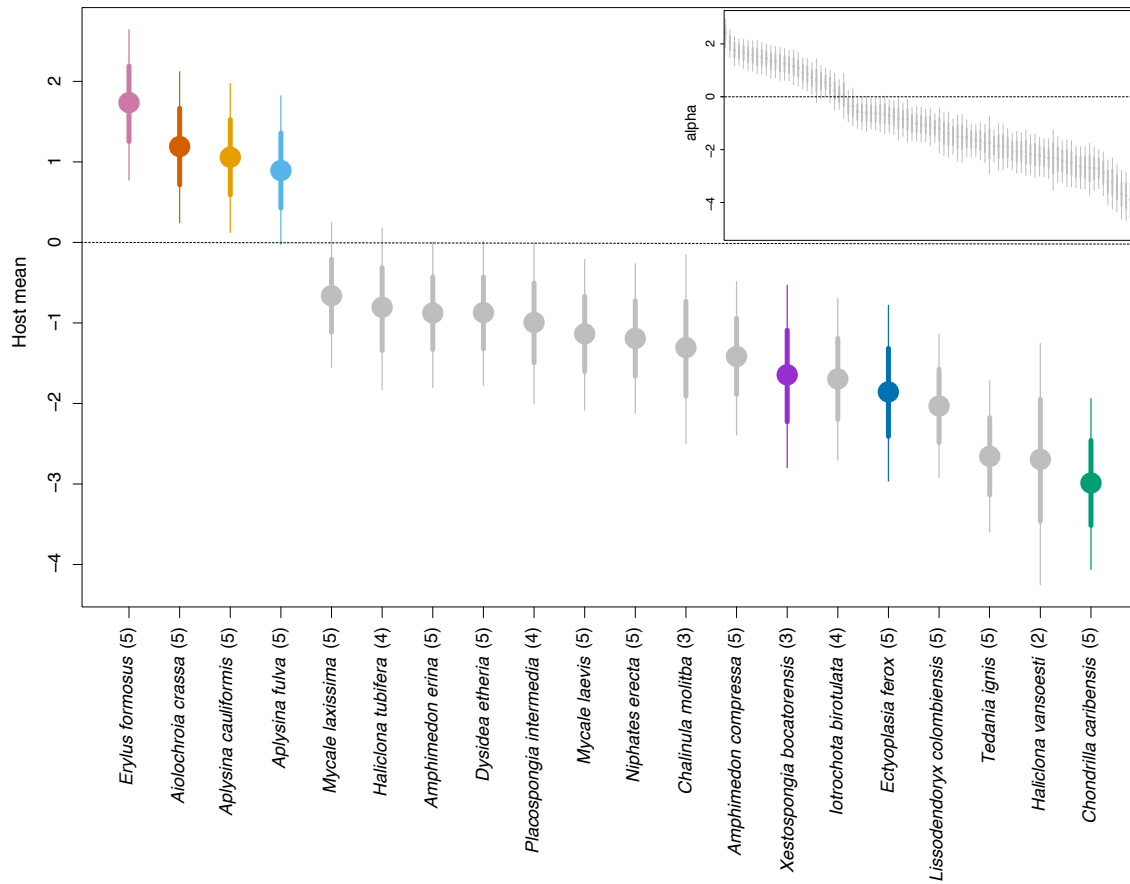

Figure 2: The main plot shows a caterpillar for the host means  $\mu(\text{host})_s$ , with the colors representing the 7 HMA hosts. The subplot shows a caterpillar plot for the row effects  $\alpha_i$ .

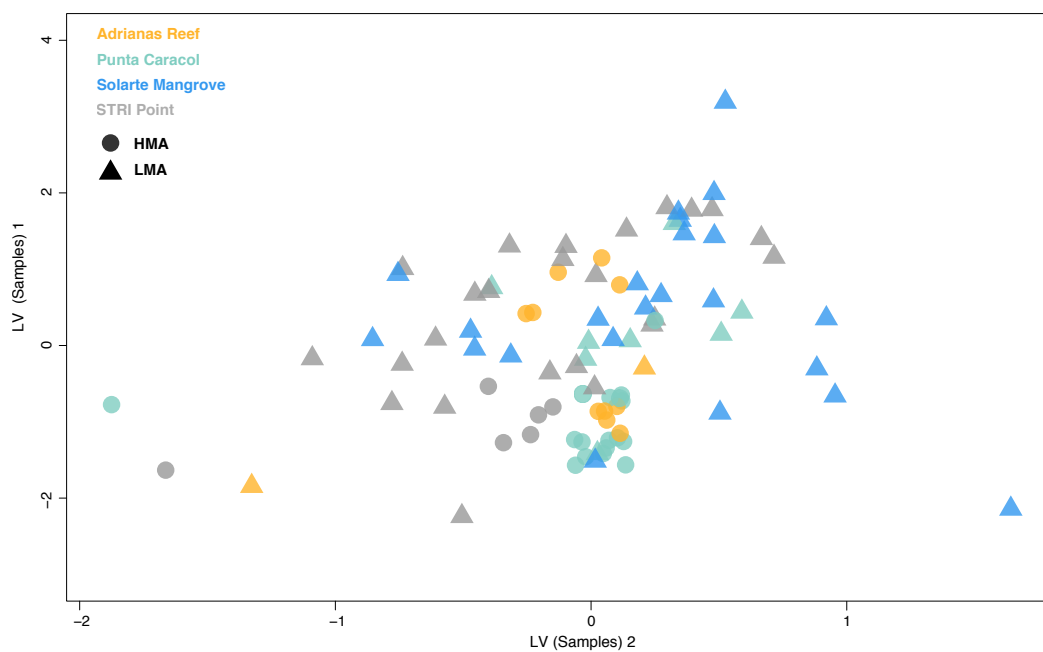

Figure 3: The plot shows the ordination constructed by the latent factors on the sample level  $Z$ , and colored by collection site and shape denote host ecotype.

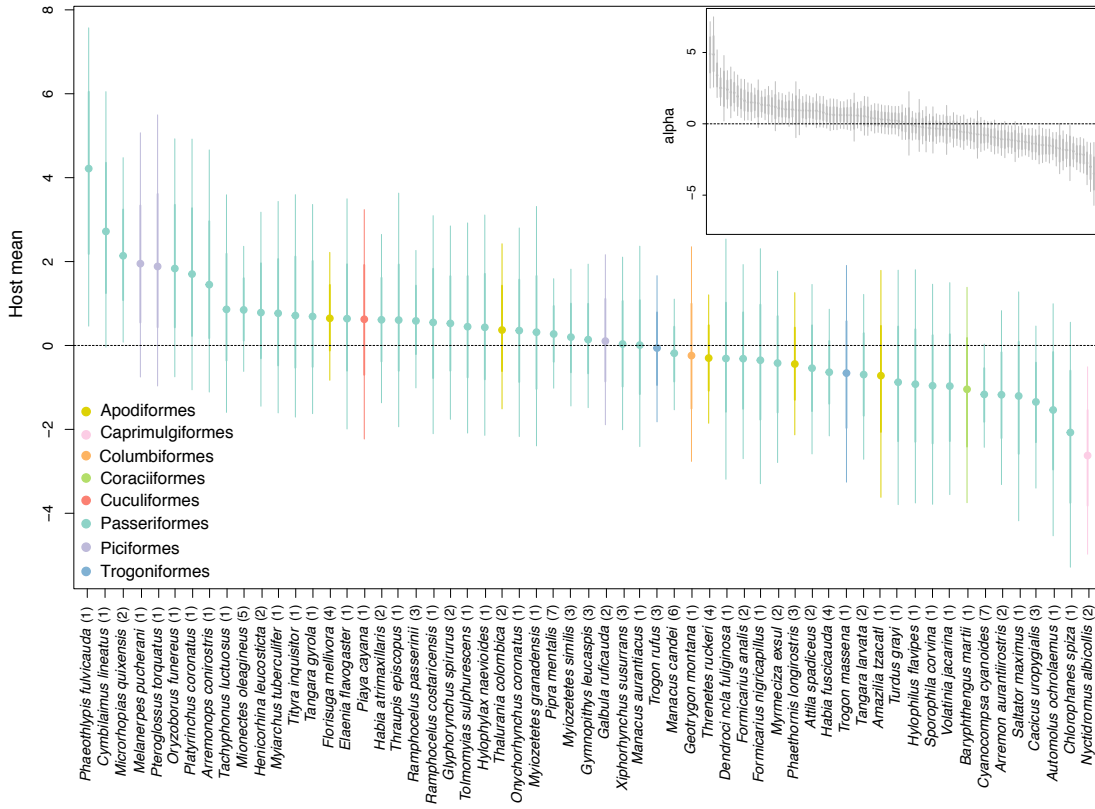

Figure 4: The main plot shows a caterpillar for the host means  $\mu(\text{host})_s$  colored by host taxonomy at the order level, while the subplot shows a caterpillar plot for the row effects  $\alpha_i$ .

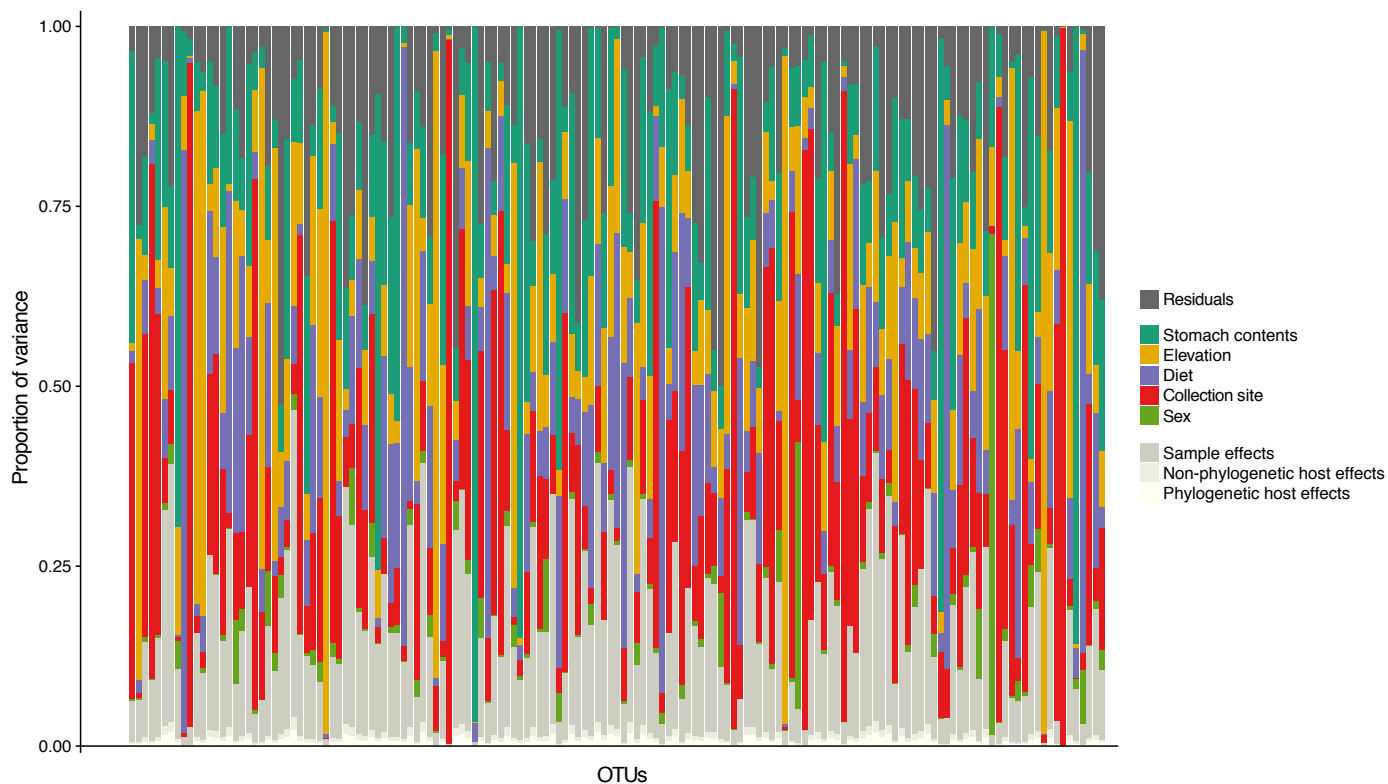

Figure 5: The relative proportion of variance in species occurrences explained by the hierarchy present on  $\alpha_i$ , the covariates included on the linear predictor  $L_{ij}$ , and the residual variance not accounted for by the modeled effects i.e., the diagonal elements of the residual covariance matrix  $\Omega$ .



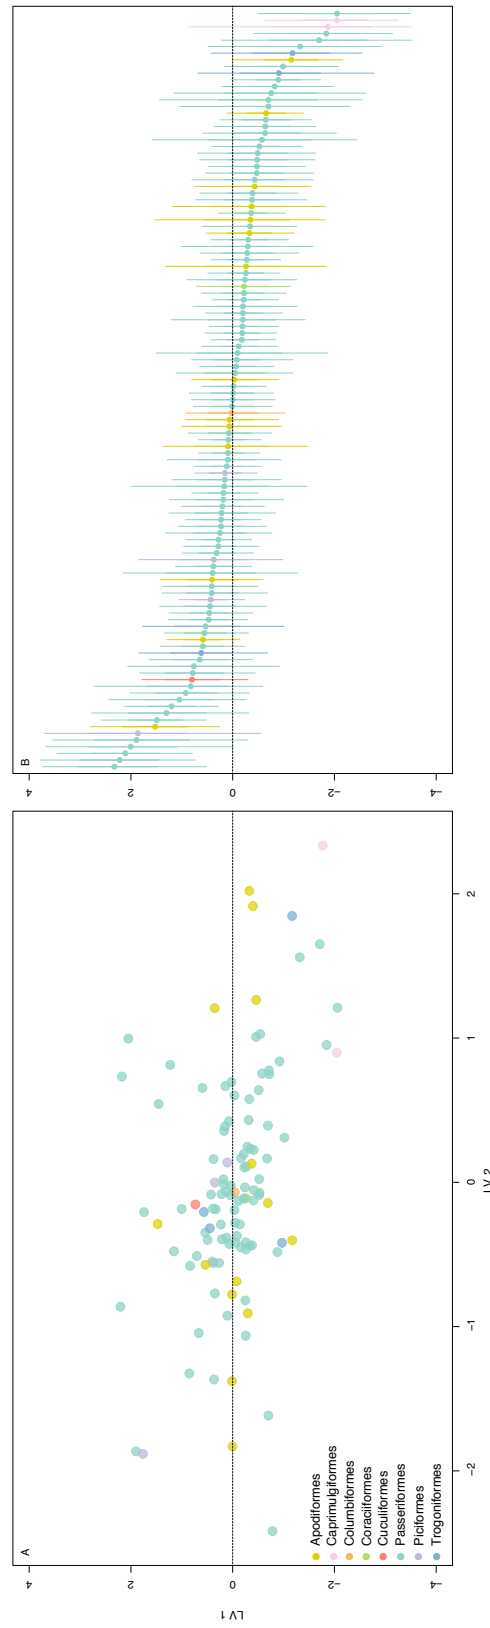

Figure 6: The left plot (A) shows the ordination constructed by the latent factors  $Z$  colored by host taxonomy (at the order level), and the right plot (B) shows the corresponding caterpillar for first latent factor  $Z_{T1}$ .
